# Supplementary material
Source: ML conference proceedings conference paper supplement (https://openreview.net/forum?id=r2zEpHIiqxc)
Supplement: supplementary_material [file attachment]

a)

```
def function(x):  
    if x < -1.6176:  
        pass  
        for y in range(7):  
            pass  
        x = x * 0.0225  
    else:  
        pass  
        x = x + 0.0005  
    return x
```

b)

```
def function(x):  
    if x < -0.4461:  
        pass  
        x = x * 0.1809  
        x = x - -0.8986  
        if x < -1.0446:  
            pass  
        else:  
            pass  
            x = x * -0.4845  
            if x < -0.2322:  
                pass  
    x = x * -0.8506  
    return x
```
