# Supplementary material
Source: ML conference proceedings conference paper supplement (https://openreview.net/forum?id=r2zEpHIiqxc)
Supplement: supplementary_material [file attachment]

a)

```

def function(x):
    x = x - -0.4087
    for y in range(8):
        pass
    x = x - 0.4198
    x = x * 0.1882
    return x

def function(x):
    for y in range(8):
        pass
    x = x + -0.2114
    x = x * 0.3071
    return x

def function(x):
    for y in range(5):
        pass
    x = x * -2.2118
    return x

def function(x):
    for y in range(8):
        pass
    x = x * 0.9308
    return x

def function(x):
    for y in range(8):
        pass
    x = x + 0.7492
    x = x - -0.0710
    return x

def function(x):
    for y in range(8):
        pass
    x = x * -1.4855
    x = x + 0.2987
    if x < -0.9295:
        pass
    return x

def function(x):
    x = x - 0.5329
    x = x + -1.3560
    for y in range(8):
        pass
    x = x + 0.5513
    return x

def function(x):
    x = x + -0.4373
    for y in range(8):
        pass
        if x > -0.6187:
            pass
            for y in range(7):
                pass
            x = x * -0.6503
            x = x - 0.2484
    return x

def function(x):
    x = x - 0.7312
    if x > 0.0509:
        pass
        for y in range(4):
            pass
        x = x - -0.4496
    else:
        pass
    return x

def function(x):
    if x > -0.6631:
        pass
        for y in range(8):
            pass
    else:
        pass
    return x

def function(x):
    if x > -0.7258:
        pass
        x = x * 0.4430
        for y in range(8):
            pass
        x = x + 1.1464
    else:
        pass
    return x

```

b)

```

def function(x):
    for y in range(8):
        pass
    x = x + -0.2186
    return x

def function(x):
    for y in range(8):
        pass
    if x < 1.8181:
        pass
        x = x - -0.2057
    x = x + 0.0787
    x = x - -0.9475
    return x

def function(x):
    if x > 1.8695:
        pass
        x = x - 0.9109
        for y in range(3):
            pass
            x = x + 0.5025
    return x

def function(x):
    for y in range(8):
        pass
    return x

def function(x):
    for y in range(8):
        pass
    for y in range(8):
        pass
    x = x - 1.3633
    return x

def function(x):
    for y in range(8):
        pass
        if x < 0.6867:
            pass
            for y in range(8):
                pass
                x = x + 0.0118
                x = x - 1.1458
    return x

def function(x):
    for y in range(8):
        pass
    return x

def function(x):
    if x < -0.2176:
        pass
        x = x * -0.1251
        if x < 0.1617:
            pass
    else:
        pass
        for y in range(8):
            pass
            if x < -1.8860:
                pass
        if x < 0.0689:
            pass
    return x

def function(x):
    if x > -0.8971:
        pass
        for y in range(8):
            pass
            x = x + 0.9104
    else:
        pass
    x = x * -0.1137
    return x

def function(x):
    x = x * 1.7570
    if x < 1.2314:
        pass
        for y in range(8):
            pass
            x = x - 0.2301
            if x < -0.5254:
                pass
                x = x - -1.7400
    else:
        pass
    return x

```
