# Supplementary material
Source: ML conference proceedings conference paper supplement (https://openreview.net/forum?id=r2zEpHIiqxc)

a)

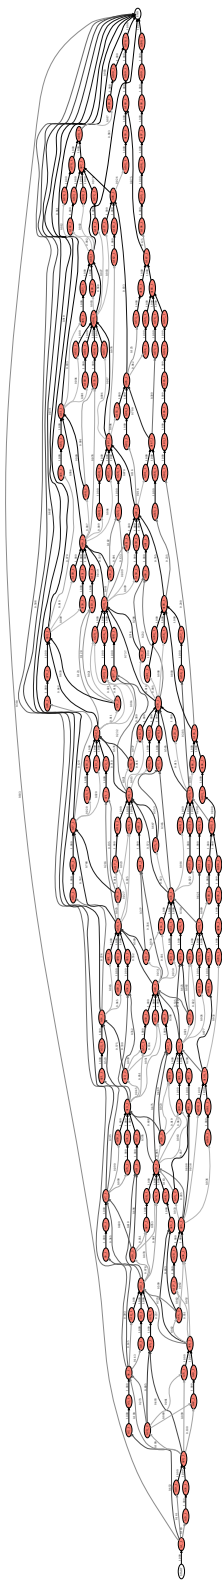

b)

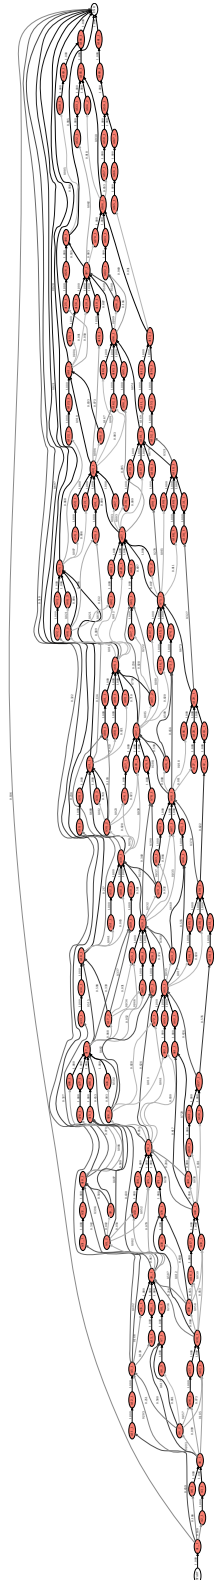

Supplement: supplementary_material [file attachment]

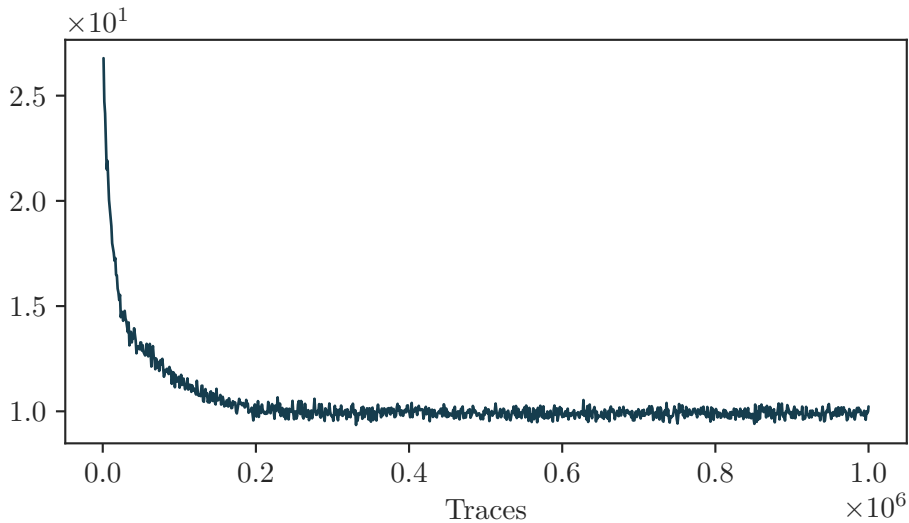

Supplement: supplementary_material [file attachment]

input layers

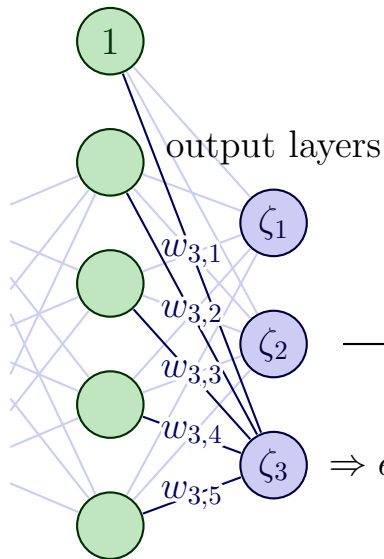

Expansion

$$\Rightarrow e^{\zeta_3} \propto \mathbb{P}_{a_t}^{\zeta}(\mathcal{U}_{a_t})$$

input layers

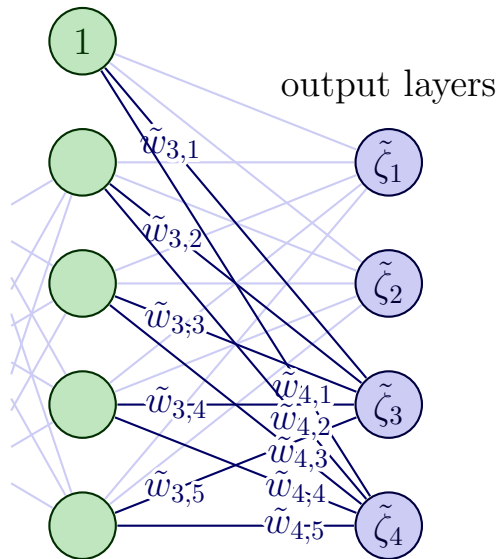

Supplement: supplementary_material [file attachment]

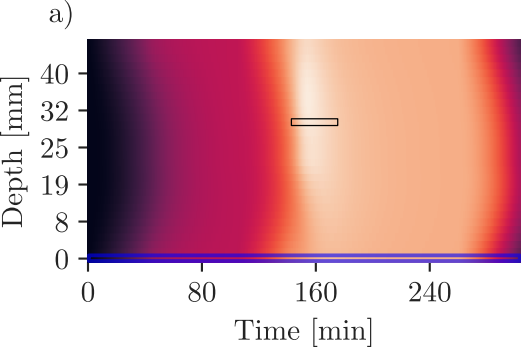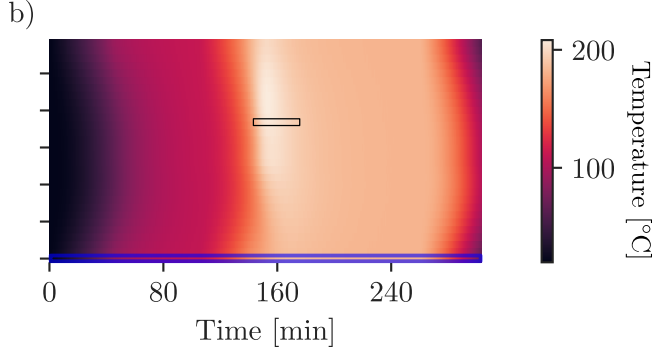

Supplement: supplementary_material [file attachment]

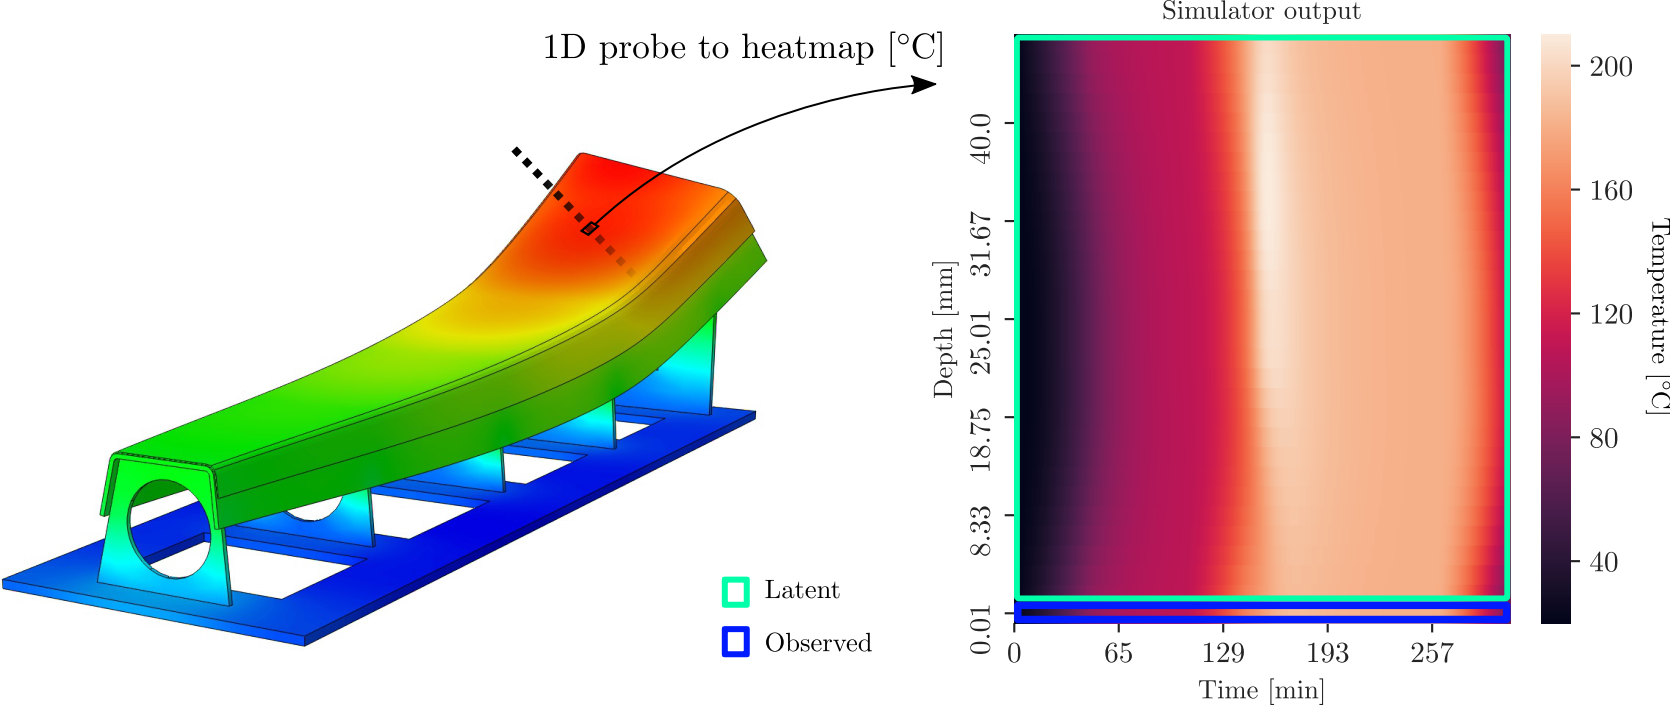

Supplement: supplementary_material [file attachment]

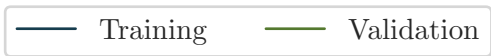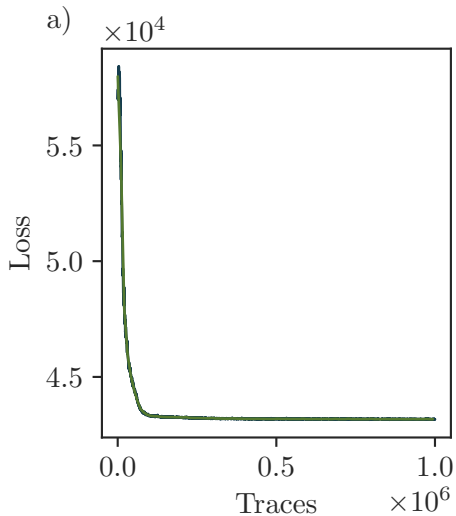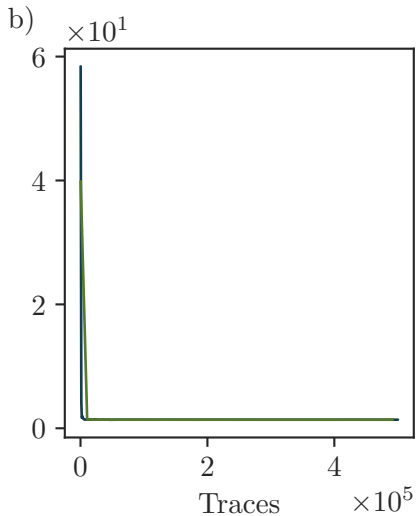

Supplement: supplementary_material [file attachment]

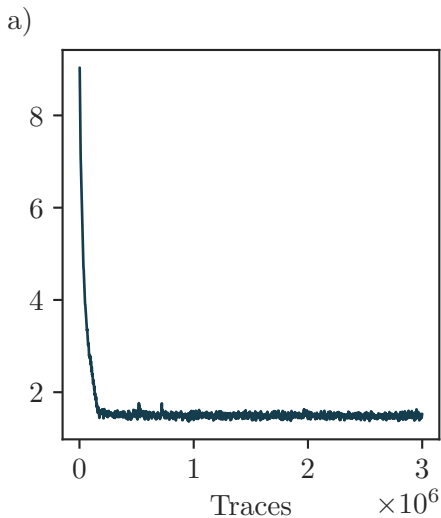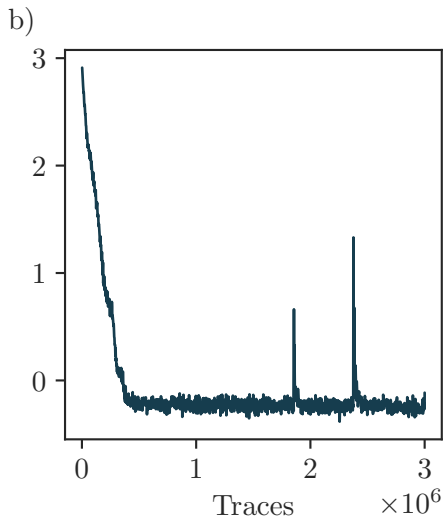

Supplement: supplementary_material [file attachment]

a)

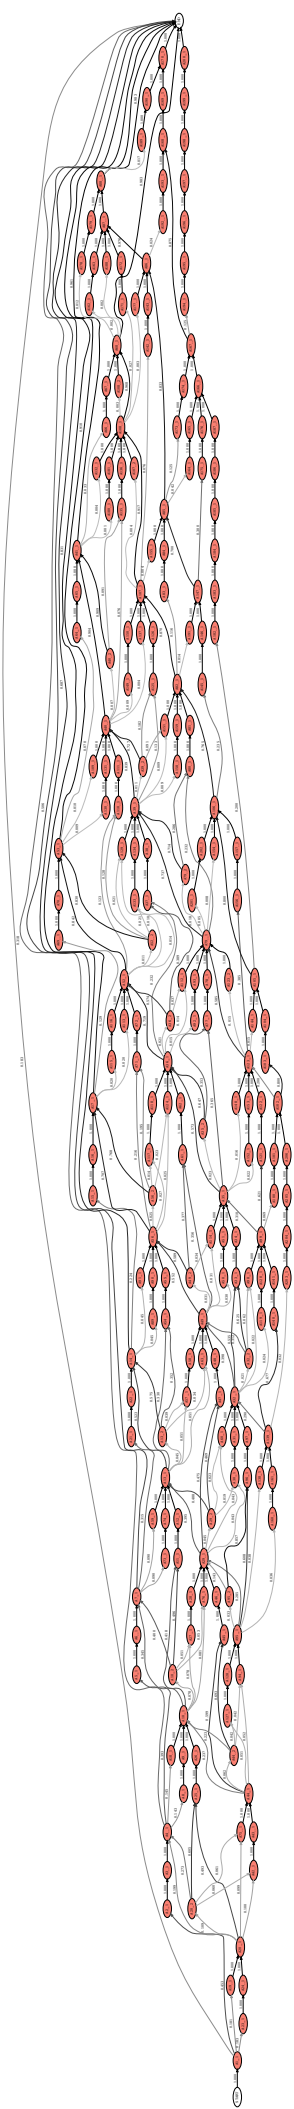

b)

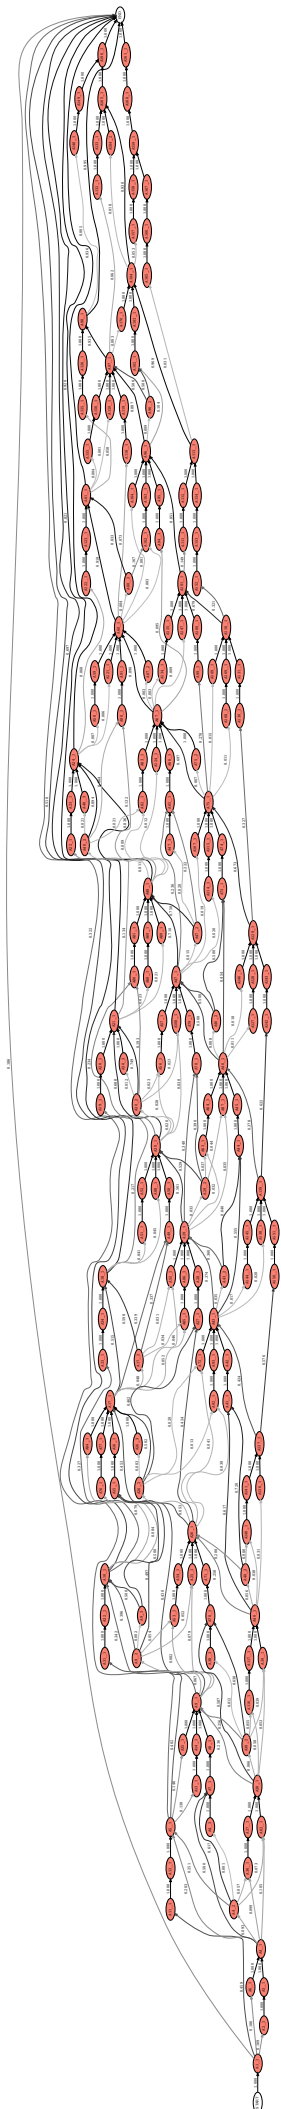

Supplement: supplementary_material [file attachment]

a)

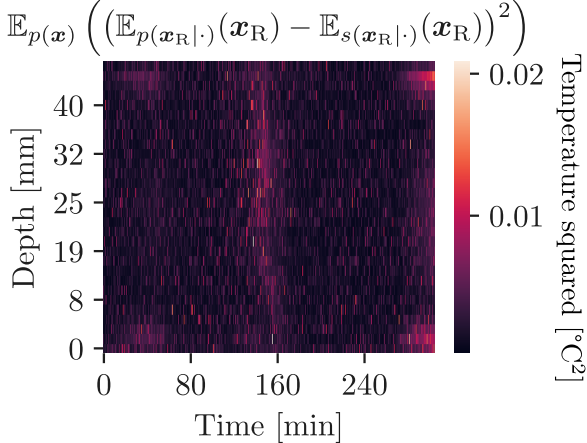

b)

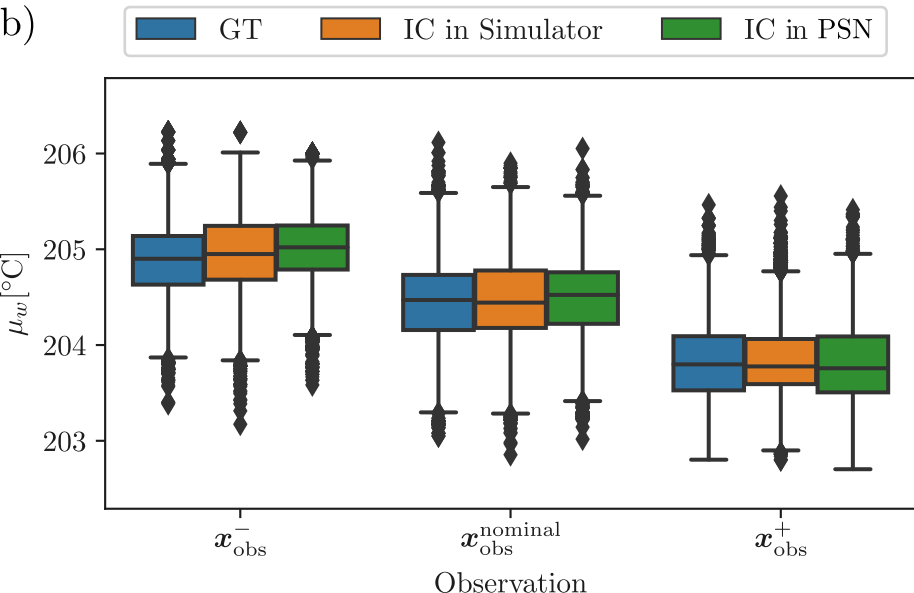

Supplement: supplementary_material [file attachment]

0.877

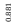

0.881

Supplement: supplementary_material [file attachment]
